# Supplementary material
Source: PubMed Central journal article supplement (PMC6764909)
Supplement: NIHMS1524515-supplement-1.pdf [file NIHMS1524515-supplement-1.pdf]

## Supplemental Table –

*Odds Ratios for Associations Between Incident Cognitive Impairment Sensitivity Analyses and Difficulty/Assistance Performing IADL †*

|                                           | SIS ≤ 4 (last two assessments) | SIS ≤ 3                       |
|-------------------------------------------|--------------------------------|-------------------------------|
| Cognitive impairment                      | 2.14 (1.65-2.78) <sup>c</sup>  | 1.91 (1.53-2.39) <sup>c</sup> |
| Assessment interval (days)                | 1.00 (1.00-1.00)               | 1.00 (1.00-1.00)              |
| Age (years at baseline)                   | 1.05 (1.05-1.06) <sup>c</sup>  | 1.05 (1.05-1.06) <sup>c</sup> |
| African American                          | 1.03 (0.94-1.12)               | 1.05 (0.96-1.15)              |
| Female                                    | 1.25 (1.15-1.37) <sup>c</sup>  | 1.26 (1.15-1.37) <sup>c</sup> |
| Education                                 | -                              | -                             |
| Less than high school vs college graduate | 1.08 (0.91-1.28)               | 1.07 (0.91-1.25)              |
| High school graduate vs college graduate  | 0.94 (0.84-1.05)               | 0.97 (0.88-1.08)              |
| Some college vs college graduate          | 1.00 (0.90-1.10)               | 1.00 (0.91-1.11)              |
| Income                                    | -                              | -                             |
| \$20,000-34,000 vs < \$20,000             | 0.78 (0.68-0.90) <sup>c</sup>  | 0.78 (0.69-0.90) <sup>c</sup> |
| \$35,000-\$75,000 vs < \$20,000           | 0.65 (0.56-0.75) <sup>c</sup>  | 0.66 (0.58-0.76) <sup>c</sup> |
| \$75,000 or more vs < \$20,000            | 0.54 (0.45-0.63) <sup>c</sup>  | 0.56 (0.48-0.66) <sup>c</sup> |
| Residing in stroke belt                   | 0.94 (0.87-1.02)               | 0.96 (0.89-1.04)              |
| Physical Activity (any vs none)           | 0.74 (0.67-0.81) <sup>c</sup>  | 0.74 (0.68-0.81) <sup>c</sup> |
| Diabetes (yes or no)                      | 1.50 (1.34-1.67) <sup>c</sup>  | 1.48 (1.33-1.64) <sup>c</sup> |
| Hypertension (yes or no)                  | 1.32 (1.21-1.44) <sup>c</sup>  | 1.30 (1.20-1.42) <sup>c</sup> |
| Coronary artery disease (yes or no)       | 1.33 (1.18-1.50) <sup>c</sup>  | 1.35 (1.20-1.52) <sup>c</sup> |
| Self-reported baseline stroke (yes or no) | 1.56 (1.26-1.92) <sup>c</sup>  | 1.57 (1.29-1.92) <sup>c</sup> |
| Incident adjudicated stroke (yes or no)   | 1.89 (1.52-2.35) <sup>c</sup>  | 1.81 (1.46-2.23) <sup>c</sup> |
| Depressive symptom severity (Year 10)     | 1.18 (1.17-1.19) <sup>c</sup>  | 1.18 (1.17-1.19) <sup>c</sup> |
|                                           | N = 13,572                     | N = 14,268                    |

† Estimates are odds ratios (95% confidence intervals)

<sup>a</sup> p < .05; <sup>b</sup> p < .01; <sup>c</sup> p < .001
